# Supplementary material
Source: Royal Society of Chemistry journal article supplement (doi:10.1039/d6dt00637j)
Supplement: d6dt00637j1.pdf [file d6dt00637j1.pdf]

**Supporting information for:**

**Rhenium-Enhanced Cu nanowire catalyst for Efficient Electrocatalytic**

**Hydrogenation of Furfural to Furfuryl Alcohol**

Chen Chen <sup>a</sup>, Changbao Zhou <sup>a</sup>, Xiaotong Mu <sup>a</sup>, Chenhao Yang <sup>a</sup>, Hongke Li <sup>a</sup>, Yiran Liu <sup>a</sup>, Yao Chen <sup>b,\*</sup> and Yunlei Zhang <sup>a,\*</sup>

<sup>a</sup> Institute of Green Chemistry and Chemical Technology, School of Chemistry and Chemical Engineering, Jiangsu University, Zhenjiang212013, P. R. China

<sup>b</sup> School of the Environment and Safety, Jiangsu University, Zhenjiang212013, P. R. China

\*Corresponding author Email: chenyaol390@ujs.edu.cn(Y.C.);jsdxzyl@ujs.edu.cn(Y.Z.)

## 1. Experimental section

### 1.1 Catalyst Characterizations

The X-ray diffraction (XRD) patterns were obtained on a Bruker D8 diffractometer using Cu K $\alpha$  radiation. The scanning range was 10-80° with a scan speed of 7° min<sup>-1</sup>. The images of samples were obtained by scanning electron microscope (SEM), transmission electron microscopy (TEM), and high-resolution TEM (HRTEM). The Brunauer–Emmett–Teller (BET) surface area of the materials was measured by N<sub>2</sub> adsorption-desorption isotherms at 77 K in an Autosorb-6B (Quantachrome Instruments). X-ray photoelectron spectroscopy (XPS) was measured by using a Thermo Fisher Scientific ESCALAB 250 with a monochromatized Al X-ray source. All XPS results were corrected by referencing the C1s speak at 284.8 eV. Electron spin resonance (ESR) spectra were recorded at room temperature on a Bruker E7407 spectrometer operating at X-band for radical intermediate detection. The HPLC analysis was performed using an Agilent Eclipse C18 column (250.0×4.6 mm, 5.0  $\mu$ m) with UV-Vis and refractive index detectors (RID). The column temperature was set at 30 °C and the mobile phase consisted of a 0.1 wt% phosphoric acid and acetonitrile mixture at a 15:85 ratio. The flow rate was gradually increased from 0.2 mL/min to 1 mL/min, with the final pressure stabilizing around 197 bar.

### 1.2 Electrochemical measurements

All electrochemical tests were conducted in a 40 mL H-type three-electrode electrolytic cell, utilizing a cation exchange membrane. The electrolyte solution consisted of 1 M boric acid with a pH of 9.2. The prepared catalyst, a platinum electrode, and a mercury oxide electrode served as the working electrode, counter electrode, and reference electrode, respectively. The geometric surface area of the working electrode was 1 cm<sup>2</sup>. For each electrocatalytic experiment, chronoamperometry

was employed, and all potentials were calibrated to the reversible hydrogen electrode (RHE) using Equation 1.

$$E_{\text{RHE}} = E_{(\text{Hg}/\text{HgO})} + 0.0592 \times \text{pH} + 0.098\#1$$

The  $E_{\text{RHE}}$  is the RHE after conversion, and the  $E_{(\text{Hg}/\text{HgO})}$  refers to the measured potential using the Hg/HgO electrode. The linear sweep voltammetry (LSV) was conducted at a scan rate of 5 mV/s, while cyclic voltammetry (CV) was performed at a scan rate of 100 mV/s. The electrochemical reduction of FF was carried out under magnetic stirring at 500 r min<sup>-1</sup>. All experiments were carried out at room temperature and repeated three times to avoid standard errors.

### 1.3 In situ FTIR

The FTIR experiment was performed using a Thermo-Fisher Nicolet iS20, equipped with a liquid nitrogen-cooled MCT detector and a Si attenuated total reflection (UATR) accessory. The samples were cut into 0.5×0.5 cm<sup>2</sup> slices and immersed in a 50 mmol/L FF solution, with pH adjusted to 7.0 and a 0.5 M boric acid buffer. The working electrode was composed of the sample, while a platinum wire and Ag/AgCl electrode were used as the counter and reference electrodes, respectively. The spectral resolution was set to 8 cm<sup>-1</sup>. Data collection was carried out simultaneously using the I-t technique at a potential of -0.65 V (vs. RHE) for 30 minutes. Prior to spectrum acquisition, the working electrode was pre-reduced at -0.65 V (vs. RHE) for 10 minutes to ensure the catalyst remained in a relatively stable state.

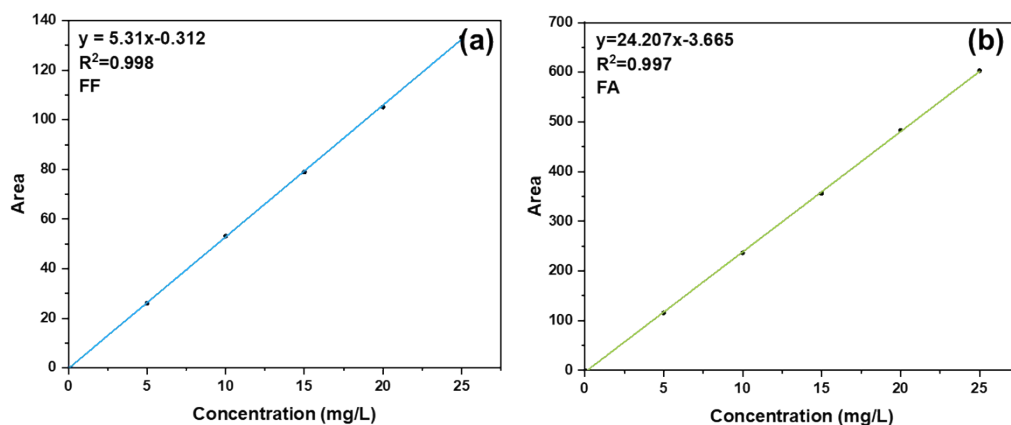

**Figure S1.** Standard curve of FF and FA.

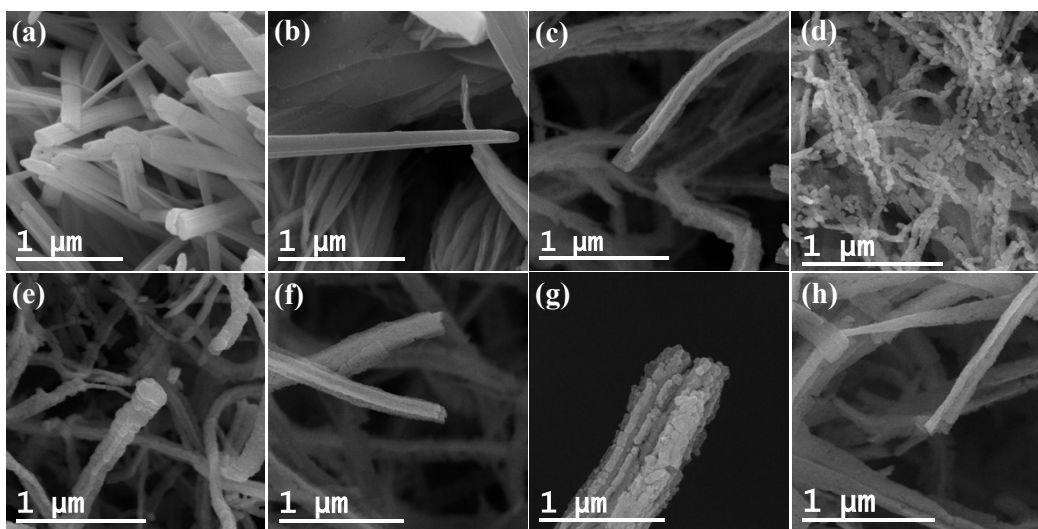

**Figure S2.** The SEM images of Cu(OH)<sub>2</sub> NW(a), CuO NW(b), Cu NW (c), CuRe<sub>10</sub> (d), CuRe<sub>20</sub> (e), CuRe<sub>30</sub> (f), CuRe<sub>40</sub> (g), CuRe<sub>50</sub> (h).

**Figure S3.** The EDS spectra of CuRe<sub>40</sub>.

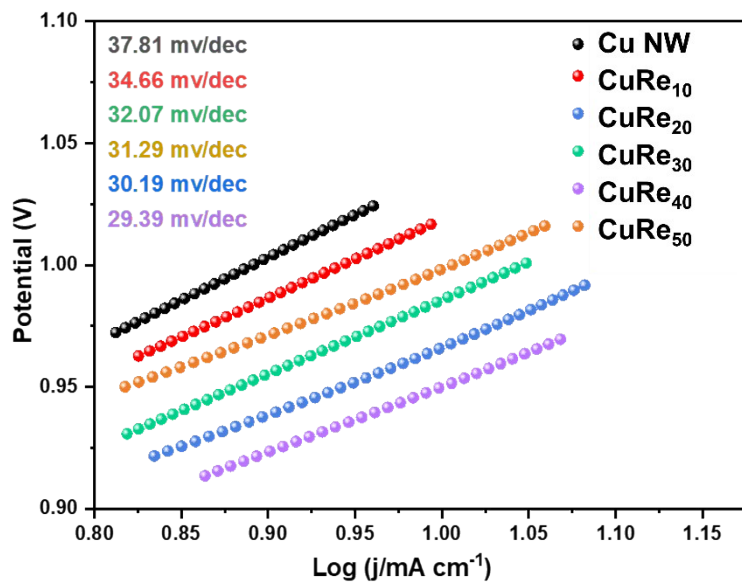

Figure S4. The Tafel slope of different samples.

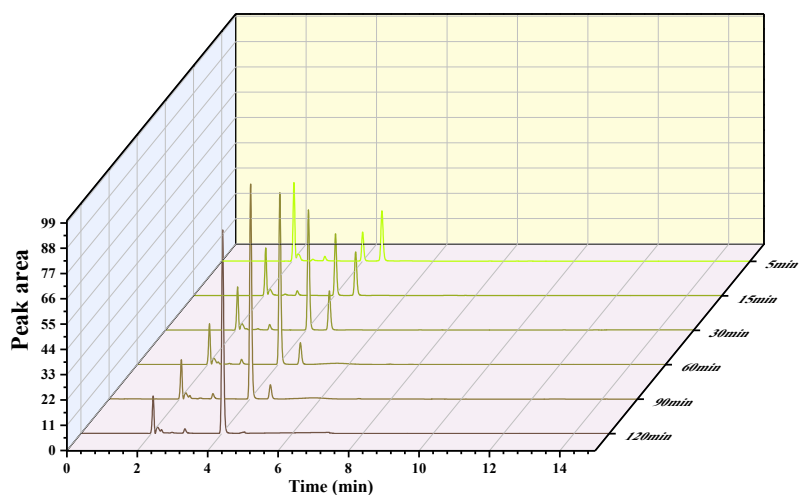

Figure S5. HPLC spectra of FF and FA.

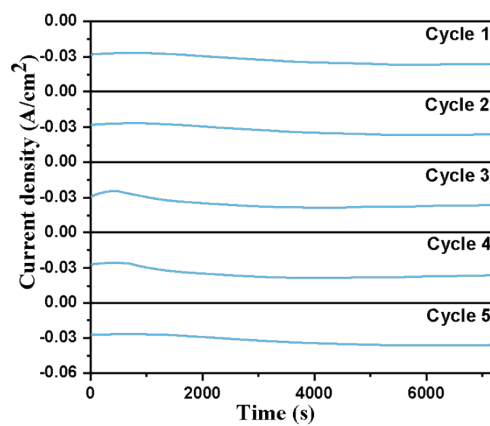

Figure S6. The I-t spectra in the regeneration experiment of CuRe<sub>40</sub>.

**Table S1.** ICP result of Re NW/CF catalysts.

| Catalysts          | Cycles | Re-loading (mg) | Re-loading (wt %) |
|--------------------|--------|-----------------|-------------------|
| CuRe <sub>10</sub> | 10     | 0.8             | 0.72              |
| CuRe <sub>20</sub> | 20     | 2.2             | 2.11              |
| CuRe <sub>30</sub> | 30     | 3.5             | 3.37              |
| CuRe <sub>40</sub> | 40     | 5.2             | 5.03              |
| CuRe <sub>50</sub> | 50     | 6.8             | 6.42              |

**Table S2.** The  $S_{\text{BET}}$  value and average pore diameter of catalysts.

| Catalysts          | $S_{\text{BET}}$ ( $\text{m}^2 \text{g}^{-1}$ ) | Average pore size (nm) |
|--------------------|-------------------------------------------------|------------------------|
| Cu NW              | 3.8208                                          | 12.848                 |
| CuRe <sub>10</sub> | 4.4292                                          | 9.5863                 |
| CuRe <sub>20</sub> | 4.6135                                          | 9.103                  |
| CuRe <sub>30</sub> | 4.7531                                          | 8.7463                 |
| CuRe <sub>40</sub> | 4.9023                                          | 8.6746                 |
| CuRe <sub>50</sub> | 5.3549                                          | 8.214                  |

**Table S3.** FE, Conversion, and Yield of FA and FF at different pH over the CuRe<sub>40</sub> catalyst.

| pH   | F.E. (%) | Conversion (%) | Yield (%) |
|------|----------|----------------|-----------|
| 6.0  | 8        | 13             | 6         |
| 9.2  | 78       | 99             | 92        |
| 12.0 | 28       | 72             | 24        |

**Table S4.** FE, Conversion, and Yield of FA and FF at different potentials over the CuRe<sub>40</sub> catalyst.

| Potential (V) | F.E. (%) | Conversion (%) | Yield (%) |
|---------------|----------|----------------|-----------|
| 1.1           | 63       | 69             | 61        |
| 1.2           | 78       | 99             | 92        |
| 1.3           | 45       | 99             | 82        |
